# Supplementary material
Source: PubMed Central journal article supplement (PMC6764866)
Supplement: NIHMS1029828-supplement-Supp_info.pdf [file NIHMS1029828-supplement-Supp_info.pdf]

**Supp. Figure S1: STRING-based protein-protein interaction network of GDF11. A.**

Analysis of the human GDF11 protein-interactome in the “String” database revealed 66 direct molecular interactors (diamond shape nodes) and their nearest neighbors (circles). B. Factors in the GDF11 network were analyzed by the bioinformatics tool “DAVID” for potential enrichment of functional categories. For example, the following functional categories relevant to orofacial development were found to be enriched at  $p$ -value < 0.05: PI3K-Akt signaling pathway (hsa0415), TGF-beta signaling pathway (hsa04350), BMP signaling pathway (GO:0030509), skeletal system development (GO:0001501), bone development (GO:0060348) and palate development (GO:0060021).

A

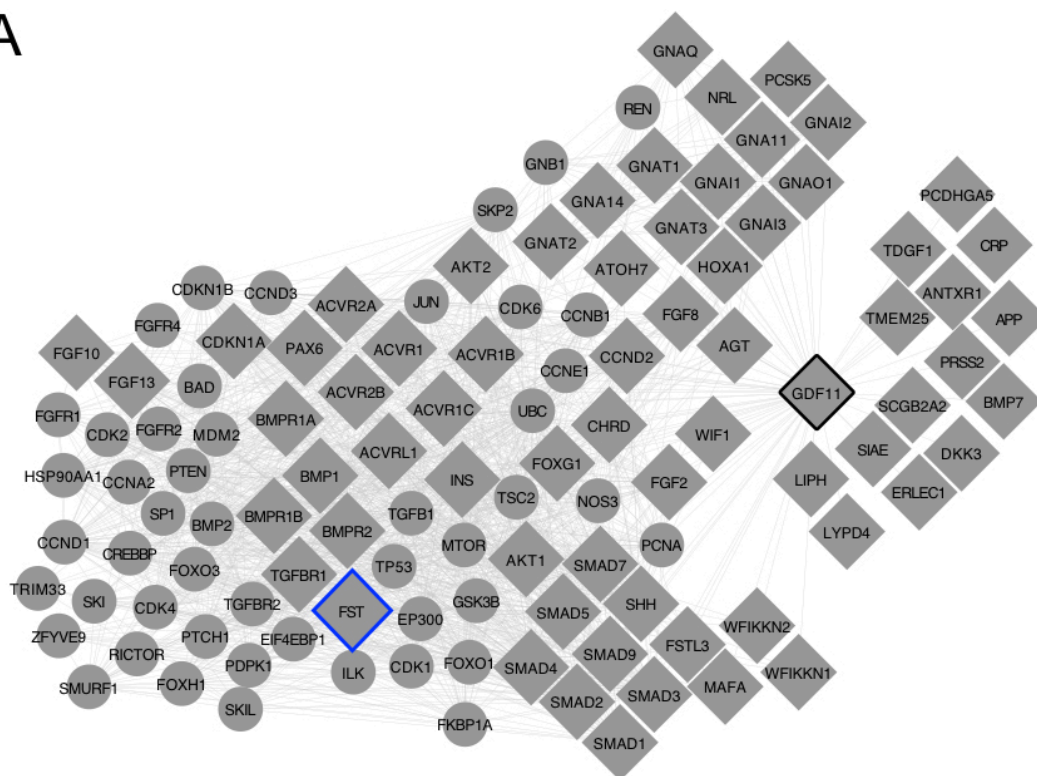

B

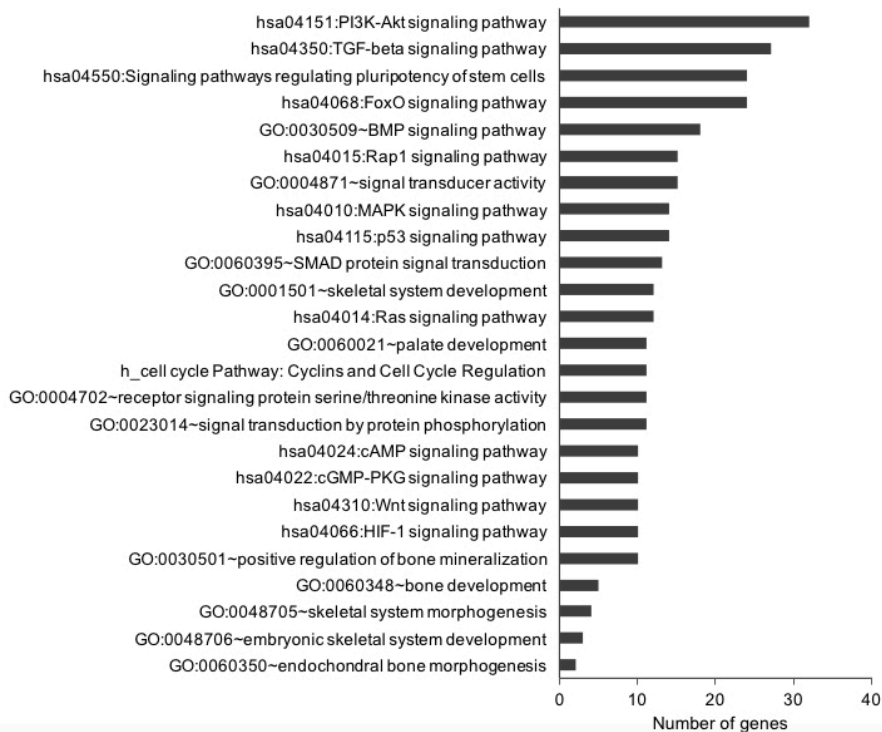

**Supp. Figure S2. Gdf11 protein-protein network expression dynamics in mouse embryonic mandibular, maxillary, frontonasal and palatal tissue.** Overlay of E11.5 mandibular, maxillary, and frontonasal expression from SysFACE on the Gdf11 protein-protein network. Differing intensities of red represent increasing transcript expression. Gdf11 direct interactors, including FST, exhibit significant expression and enrichment in these tissues.

E11.5 frontonasal expression overlay

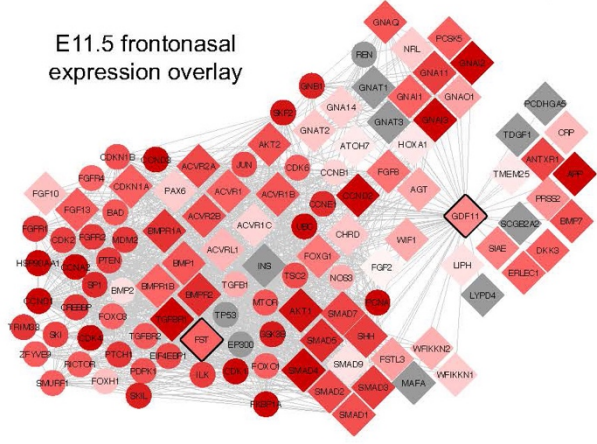

E11.5 mandible expression overlay

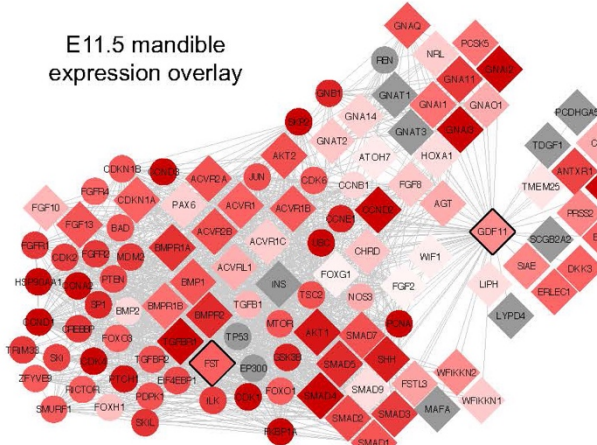

E11.5 maxilla expression overlay

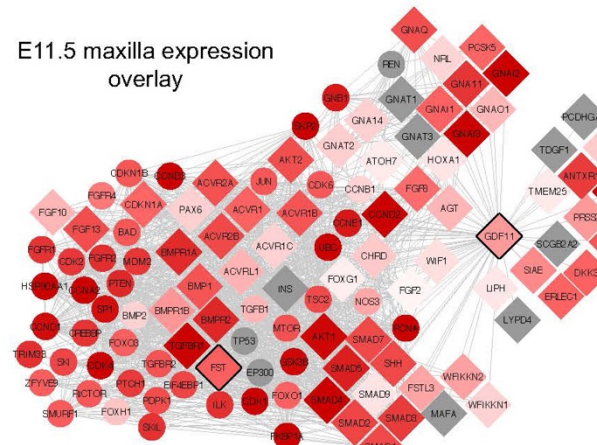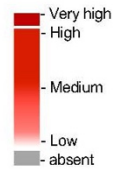

**Supp. Figure S3. Western blot of WT and mutant Fs288 expression.** HEK293T cells were transfected with equal amounts of Fs288 WT or C56Y vector DNA. 48 and 72hrs post transfection conditioned media was collected and analyzed via Western blot under non-reducing conditions with an anti-follistatin antibody.

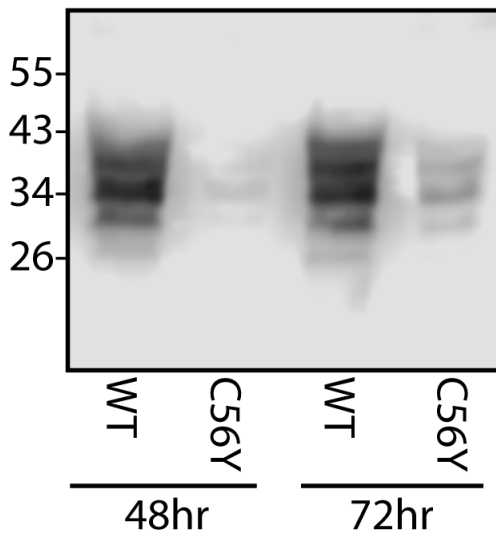

**Supp. Table S1: Rare variants identified by exome sequencing in Family 4527**

MAF = minor allele frequency (gnomAD). nd = not detected

| gene            | Chr | Position         | MAF                   | AA change | Polyphen Score / prediction | Sift Score / prediction | Cadd scaled |
|-----------------|-----|------------------|-----------------------|-----------|-----------------------------|-------------------------|-------------|
| <i>LGALS8</i>   | 1   | g.236702344GAA>G | nd                    | p.E100X   | None                        | None                    | None        |
| <i>CHRM3</i>    | 1   | g.240071784T>C   | 2.05x10 <sup>-6</sup> | p.S345P   | 0.199 / benign              | 0.02 / deleterious      | 21.4        |
| <i>TNFAIP6</i>  | 2   | g.152235980G>A   | 5.22x10 <sup>-5</sup> | p.G256E   | 0.005 / benign              | 0.23 / tolerated        | 15.49       |
| <i>HARS</i>     | 5   | g.140057542A>G   | nd                    | p.I194T   | 0.967 / Prob damaging       | 0.01 / deleterious      | 28.3        |
| <i>PCDHGA5</i>  | 5   | g.140744853T>C   | 4.01x10 <sup>-6</sup> | p.V319A   | 0.794 / Poss damaging       | 0.04 / deleterious      | 17.99       |
| <i>AIM1</i>     | 6   | g.106967614C>T   | 2.47x10 <sup>-3</sup> | p.T436I   | 0.303 / benign              | 0.00 / deleterious      | 15.65       |
| <i>HBS1L</i>    | 6   | g.135318600A>G   | 3.98x10 <sup>-6</sup> | p.I245T   | 0.182 / benign              | 0.23 / tolerated        | 18.27       |
| <i>TNS3</i>     | 7   | g.47331594G>A    | 5.11x10 <sup>-3</sup> | p.T1296M  | 0.915 / Prob damaging       | 0.04 / deleterious      | 19.72       |
| <i>FOXD4</i>    | 9   | g.117593T>C      | nd                    | p.N176S   | 0.741 / Poss damaging       | 0.22 / tolerated        | 14.95       |
| <i>GDF11</i>    | 12  | g.56143335G>A    | nd                    | p.R298Q   | 0.969 / Prob damaging       | 0.01 / deleterious      | 35          |
| <i>SLC35E3</i>  | 12  | g.69145890A>G    | 1.50x10 <sup>-4</sup> | p.M198V   | 0.159 / benign              | 0.00 / deleterious      | 16.09       |
| <i>PCDH8</i>    | 13  | g.53420234C>T    | 1.60x10 <sup>-4</sup> | p.E780K   | 0.058 / benign              | 0.02 / deleterious      | 27.2        |
| <i>MAN2C1</i>   | 15  | g.75648535G>A    | 4.02x10 <sup>-6</sup> | p.S988L   | 0.067 / benign              | 0.12 / tolerated        | 14.95       |
| <i>ADAMTSL3</i> | 15  | g.84561509G>A    | 3.98x10 <sup>-6</sup> | p.V446I   | 0.462 / Poss damaging       | 0.07 / tolerated        | 27.6        |
| <i>TM2D3</i>    | 15  | g.102182739G>T   | 2.01x10 <sup>-5</sup> | p.D229E   | 1.000 / Prob damaging       | 0.00 / deleterious      | 15.27       |
| <i>TRPM2</i>    | 21  | g.45815425C>G    | 1.13x10 <sup>-3</sup> | p.I641M   | 0.109 / benign              | 0.04 / deleterious      | 16.1        |

**Supp. Table S2: DOMINO prediction of candidate genes in Family 4527**

| gene            | LDA Score | Class                        | Probability of being AD |
|-----------------|-----------|------------------------------|-------------------------|
| <i>GDF11</i>    | 2.599     | Very likely dominant         | 0.998                   |
| <i>CHRM3</i>    | 1.368     | Very likely dominant         | 0.911                   |
| <i>TNS3</i>     | 0.956     | Likely dominant              | 0.774                   |
| <i>PCDH8</i>    | 0.284     | Either dominant or recessive | 0.428                   |
| <i>TRPM2</i>    | 0.240     | Either dominant or recessive | 0.407                   |
| <i>FOXD4</i>    | 0.147     | Likely recessive             | 0.364                   |
| <i>HBS1L</i>    | -0.247    | Likely recessive             | 0.223                   |
| <i>HARS</i>     | -0.325    | Likely recessive             | 0.202                   |
| <i>TNFAIP6</i>  | -0.501    | Very likely recessive        | 0.163                   |
| <i>PCDHGA5</i>  | -0.560    | Very likely recessive        | 0.152                   |
| <i>AIM1</i>     | -0.858    | Very likely recessive        | 0.110                   |
| <i>MAN2C1</i>   | -0.973    | Very likely recessive        | 0.098                   |
| <i>TM2D3</i>    | -0.997    | Very likely recessive        | 0.095                   |
| <i>CAGE1</i>    | -1.016    | Very likely recessive        | 0.094                   |
| <i>ADAMTSL3</i> | -1.407    | Very likely recessive        | 0.068                   |
| <i>LGALS8</i>   | -1.536    | Very likely recessive        | 0.063                   |
| <i>SLC35E3</i>  | -1.679    | Very likely recessive        | 0.058                   |

**Supp. Table S3: Rare variants identified by exome sequencing in Family 22.**

MAF = minor allele frequency (gnomAD). nd = not detected

| gene            | Chr | Position                   | MAF                   | AA change  | Polyphen Score / prediction | Sift Score / prediction | Cadd scaled |
|-----------------|-----|----------------------------|-----------------------|------------|-----------------------------|-------------------------|-------------|
| <i>EML4</i>     | 2   | g.42472707C>T              | nd                    | p.R30*     | None                        | None                    | 29.1        |
| <i>ABTB1</i>    | 3   | g.127394882G>A             | 7.46x10 <sup>-5</sup> | p.R82H     | 0.996 / Prob damaging       | 0.00 / deleterious      | 21.8        |
| <i>SERPINI2</i> | 3   | g.167183441A>T             | 2.63x10 <sup>-4</sup> | p.S167T    | 0.097 / benign              | 0.14 / tolerated        | 19.46       |
| <i>PPEF2</i>    | 4   | g.76809466A>G              | nd                    | p.Y145H    | 1.000 / Prob damaging       | 0.00 / deleterious      | 24.2        |
| <i>C5orf42</i>  | 5   | g.37108485C>G              | nd                    | p.E3109D   | 0.024 / benign              | 0.16 / tolerated        | 22.9        |
| <i>FST</i>      | 5   | g.52778791G>A              | nd                    | p.C56Y     | 0.822 / Poss damaging       | 0.00 / deleterious      | 28.8        |
| <i>IL31RA</i>   | 5   | g.55178902T>G              | nd                    | p.V162G    | 0.891 / Poss damaging       | 0.00 / deleterious      | 20.6        |
| <i>SPARC</i>    | 5   | g.151043709G>C             | 1.99x10 <sup>-5</sup> | p.D274E    | 0.817 / Poss damaging       | 0.00 / deleterious      | 23.9        |
| <i>TENM2</i>    | 5   | g.167474466G>T             | 1.28x10 <sup>-5</sup> | p.Q407H    | 0.078 / benign              | 0.01 / deleterious      | 18.84       |
| <i>RNF20</i>    | 9   | g.104302543A>G             | nd                    | p.D63G     | 0.000 / benign              | 0.01 / deleterious      | 17.91       |
| <i>ENTPD7</i>   | 10  | g.101458425G>GC            | nd                    | p.C382CX   | None                        | None                    | None        |
| <i>ENTPD7</i>   | 10  | g.101458427G<br>>GAGCCCCCT | nd                    | p.G383EPPX | None                        | None                    | None        |
| <i>NCAPD3</i>   | 11  | g.134079367T>C             | 7.87x10 <sup>-5</sup> | p.D191G    | 0.199 / benign              | 0.20 / tolerated        | 23.5        |
| <i>MYO1A</i>    | 12  | g.57434994C>G              | nd                    | p.E415Q    | 0.740 / Poss damaging       | 0.19 / tolerated        | 21.8        |
| <i>HERC1</i>    | 15  | g.63930974T>A              | nd                    | p.D3968V   | 0.998 / Prob damaging       | 0.13 / tolerated        | 24.4        |
| <i>VMAC</i>     | 19  | g.5905029G>T               | 6.61x10 <sup>-5</sup> | p.R43L     | 0.008 / benign              | 0.18 / tolerated        | 16.09       |
| <i>FFAR2</i>    | 19  | g.35941218G>A              | 7.95x10 <sup>-6</sup> | p.R201H    | 0.784 / Poss damaging       | 0.07 / tolerated        | 20.1        |
| <i>C19orf47</i> | 19  | g.40832261T>A              | nd                    | p.E228V    | 0.382 / benign              | 0.02 / deleterious      | 23.7        |
| <i>A1BG</i>     | 19  | g.58858937A>G              | nd                    | p.L421P    | 0.997 / Prob damaging       | 0.00 / deleterious      | 16.19       |
| <i>CRYBB2</i>   | 22  | g.25620990G>C              | nd                    | p.V54L     | 0.966 / Prob damaging       | 0.01 / deleterious      | 27.9        |



**Supp. Table S4: DOMINO prediction of candidate genes in Family 22**

| gene            | LDA Score | Class                        | Probability of being AD |
|-----------------|-----------|------------------------------|-------------------------|
| <i>FST</i>      | 3.300     | Very likely dominant         | 1.000                   |
| <i>SPARC</i>    | 2.120     | Very likely dominant         | 0.991                   |
| <i>HERC1</i>    | 1.804     | Very likely dominant         | 0.974                   |
| <i>TENM2</i>    | 1.680     | Very likely dominant         | 0.962                   |
| <i>RNF20</i>    | 0.885     | Likely dominant              | 0.741                   |
| <i>CRYBB2</i>   | 0.299     | Either dominant or recessive | 0.436                   |
| <i>EML4</i>     | -0.027    | Likely recessive             | 0.294                   |
| <i>FFAR2</i>    | -0.072    | Likely recessive             | 0.278                   |
| <i>C19orf47</i> | -0.350    | Very likely recessive        | 0.196                   |
| <i>A1BG</i>     | -0.512    | Very likely recessive        | 0.161                   |
| <i>MYO1A</i>    | -0.535    | Very likely recessive        | 0.157                   |
| <i>IL31RA</i>   | -0.644    | Very likely recessive        | 0.138                   |
| <i>PPEF2</i>    | -0.654    | Very likely recessive        | 0.137                   |
| <i>VMAC</i>     | -0.723    | Very likely recessive        | 0.126                   |
| <i>NCAPD3</i>   | -0.918    | Very likely recessive        | 0.103                   |
| <i>SERPINI2</i> | -1.035    | Very likely recessive        | 0.092                   |
| <i>C5orf42</i>  | -1.200    | Very likely recessive        | 0.080                   |
| <i>ABTB1</i>    | -1.370    | Very likely recessive        | 0.070                   |
| <i>ENTPD7</i>   | -1.444    | Very likely recessive        | 0.066                   |

**Supp. Table S5: Annotation of *GDF11* and *FST* variants in Families 22 and 4527**

|                                          | <i>GDF11</i>                | <i>FST</i>                 |
|------------------------------------------|-----------------------------|----------------------------|
| <b>Family</b>                            | 4527                        | 22                         |
| <b>Country of origin</b>                 | USA                         | Colombia                   |
| <b>Pedigree</b>                          | Multi-affected AD           | Multi-affected AD          |
| <b>Genomic variation</b>                 | chr12(GRCh37):g.56143335G>A | chr5(GRCh37):g.52778791G>A |
| <b>Exon</b>                              | Exon 3 of 3                 | Exon 2 of 6                |
| <b>cDNA variation</b>                    | NM_005811.4:c.893G>A        | NM_013409.2:c.167G>A       |
| <b>Effect</b>                            | Nonsynonymous SNV           | Nonsynonymous SNV          |
| <b>Protein variation</b>                 | NP_005802.1:p.(Arg298Gln)   | NP_037541.1:p.(Cys56Tyr)   |
| <b>Effect</b>                            | Missense                    | Missense                   |
| <b>PFAM domain</b>                       | RXXR motif                  | CR-NTD                     |
| <b>Pathogenicity Classification</b>      | Likely pathogenic           | Likely Pathogenic          |
| <b>ACMG Evidence Group</b>               | PS3, PM1, PM2, PP3          | PS3, PM1, PM2, PP3         |
| <b>RVIS v2</b>                           | 49.76%                      | 82.45%                     |
| <b>ExAC Missense constraint</b>          | z = 4.47                    | z=2.92                     |
| <b>ExAC LoF intolerance</b>              | pLi = 0.96                  | pLI=0.96                   |
| <b>CADD score/prediction</b>             | 35 Damaging                 | 28.8 Damaging              |
| <b>REVEL score/prediction</b>            | 0.608 Damaging              | 0.939 Damaging             |
| <b>PROVEAN score/prediction</b>          | -3.2 Damaging               | -9.72 Damaging             |
| <b>SIFT score/prediction</b>             | 0.001 Damaging              | 0 Damaging                 |
| <b>Polyphen2 (HVAR) score/prediction</b> | 0.982 Probably damaging     | 0.766 Probably damaging    |
| <b>Polyphen2 (HDIV) score/prediction</b> | 1 Probably damaging         | 0.979 Probably damaging    |

|                                           |        |                 |        |                 |
|-------------------------------------------|--------|-----------------|--------|-----------------|
| <b>Mutation Taster score/prediction</b>   | 1      | Disease causing | 1      | Disease causing |
| <b>FATHMM score/prediction</b>            | -1.54  | Damaging        | -7.31  | Damaging        |
| <b>LRT score</b>                          | 0      | Deleterious     | 0      | Deleterious     |
| <b>Mutation Assessor score/prediction</b> | 3.09   | Medium          | 3.065  | Medium          |
| <b>VEST3 score/prediction</b>             | 0.782  | Damaging        | 0.991  | Damaging        |
| <b>MetaSVM score/prediction</b>           | 0.547  | Damaging        | 0.964  | Damaging        |
| <b>MetaLR score/prediction</b>            | 0.695  | Damaging        | 0.991  | Damaging        |
| <b>M CAP score/prediction</b>             | 0.141  | Damaging        | 0.808  | Damaging        |
| <b>DANN score/prediction</b>              | 0.999  | Damaging        | 0.996  | Damaging        |
| <b>FATHMM MKL score/prediction</b>        | 0.97   | Damaging        | 0.996  | Damaging        |
| <b>Eigen score/prediction</b>             | 0.865  | Damaging        | 0.733  | Damaging        |
| <b>GenoCanyon score/prediction</b>        | 1      | Damaging        | 1      | Damaging        |
| <b>fitCons score/prediction</b>           | 0.672  | Tolerable       | 0.726  | Damaging        |
| <b>GERP score/prediction</b>              | 4.95   | Conserved       | 4.8    | Conserved       |
| <b>phyloP score/prediction</b>            | 10.003 | Conserved       | 9.253  | Conserved       |
| <b>phastCons score/prediction</b>         | 1      | Conserved       | 1      | Conserved       |
| <b>SiPhy score/prediction</b>             | 16.072 | Conserved       | 17.834 | Conserved       |
| <b>ReVe score/prediction</b>              | 0.7769 | Tolerated       | 0.9077 | Tolerated       |
| <b>dbSNP</b>                              | -      |                 | -      |                 |
| <b>gnomAD Exome ALL</b>                   | -      |                 | -      |                 |
| <b>gnomAD genome ALL</b>                  | -      |                 | -      |                 |
| <b>ExAC ALL</b>                           | -      |                 | -      |                 |
| <b>ExAC nontcga ALL</b>                   | -      |                 | -      |                 |

|                              |   |   |
|------------------------------|---|---|
| <b>ExAC nonpsych ALL</b>     | - | - |
| <b>1000genomes ALL</b>       | - | - |
| <b>ESP6500siv2 ALL</b>       | - | - |
| <b>Kaviar AF</b>             | - | - |
| <b>HRC AF</b>                | - | - |
| <b>HRC non1000G AF</b>       | - | - |
| <b>CG69</b>                  | - | - |
| <b>COSMIC</b>                | - | - |
| <b>ICGC</b>                  | - | - |
| <b>ClinVar</b>               | - | - |
| <b>denovo-db</b>             | - | - |
| <b>GWAS Catalog</b>          | - | - |
| <b>Segmental duplication</b> | - | - |

**Supp. Table S6: Genotyping of candidate variants in Families 4527 and 22.**

Affected individuals = asterisked. Genotypes in grey font indicate heterozygosity in an unaffected individual.

**A****Family 4527**

| gene         | variant                  | individual  |             |               |              |               |               |
|--------------|--------------------------|-------------|-------------|---------------|--------------|---------------|---------------|
|              |                          | <u>II.1</u> | <u>II.5</u> | <u>III.1*</u> | <u>III.3</u> | <u>III.8*</u> | <u>III.10</u> |
| <i>CHRM3</i> | <i>g.240071784T&gt;C</i> | TT          | TC          | TC            | TT           | TC            | TT            |
| <i>TNS3</i>  | <i>g.47331594G&gt;A</i>  | GG          | GA          | GA            | GA           | GA            | GA            |
| <i>PCDH8</i> | <i>g.53420234C&gt;T</i>  | CT          | CC          | CT            | CT           | CT            | CT            |
| <i>TRPM2</i> | <i>g.45815425C&gt;G</i>  | CG          | CC          | CG            | CC           | CG            | CG            |
| <i>HARS</i>  | <i>g.140057542A&gt;G</i> | AG          | AA          | AG            | AG           | AG            | AA            |
| <i>TM2D3</i> | <i>g.102182739G&gt;T</i> | GT          | GG          | GT            | GT           | GT            | GT            |
| <i>GDF11</i> | <i>g.56143335G&gt;A</i>  | GG          | GG          | GA            | GG           | GA            | GG            |

**B****Family 22**

| gene         | variant                  | individual |              |             |               |               |
|--------------|--------------------------|------------|--------------|-------------|---------------|---------------|
|              |                          | <u>I.1</u> | <u>II.1*</u> | <u>II.2</u> | <u>III.2*</u> | <u>III.3*</u> |
| <i>SPARC</i> | <i>g.151043709G&gt;C</i> | GC         | GC           | GG          | GC            | GC            |
| <i>HERC1</i> | <i>g.63930974T&gt;A</i>  | TA         | TA           | TT          | TA            | TA            |
| <i>TENM2</i> | <i>g.167474466G&gt;T</i> | GT         | GT           | GG          | GT            | GT            |
| <i>RNF20</i> | <i>g.104302543A&gt;G</i> | AG         | AG           | AA          | AG            | AG            |
| <i>EML4</i>  | <i>g.42472707C&gt;T</i>  | CT         | CT           | CC          | CT            | CT            |
| <i>FST</i>   | <i>g.52778791G&gt;A</i>  | GG         | GA           | GG          | GA            | GA            |
